# Supplementary material for: Co-Occurrence of Borrelia burgdorferi Sensu Lato and Babesia spp. DNA in Ixodes ricinus Ticks Collected from Vegetation and Pets in the City of Poznań, Poland
Source: MDPI journal article supplement (doi:10.3390/pathogens13040307), 2024-04-10

Figure S1. Bayesian phylogenetic analysis of amplicon sequence variants (ASV) of the V4 region of the 16S rRNA gene found in this study. Numbers near branches show support values (PP); only values >50% are present.

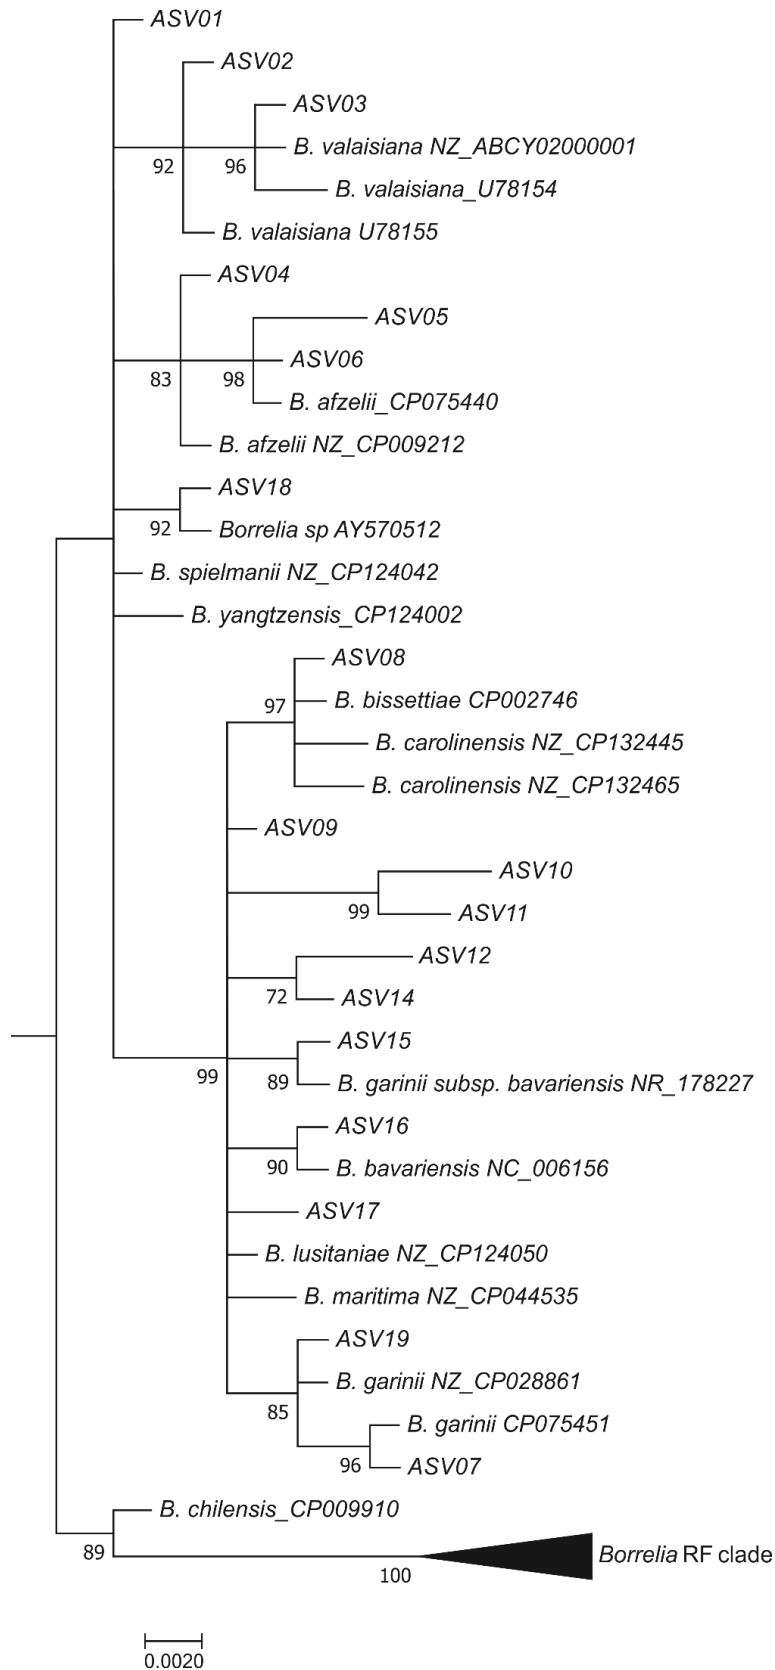

Supplement: s1 [file s1]
