# Supplementary material for: Co-Occurrence of Borrelia burgdorferi Sensu Lato and Babesia spp. DNA in Ixodes ricinus Ticks Collected from Vegetation and Pets in the City of Poznań, Poland
Source: MDPI journal article supplement (doi:10.3390/pathogens13040307), 2024-04-10
Supplement: s1 [file s1]

Table S1. Sequences of the V4 16S rDNA region used in this study.

| <b>Species</b>                              | <b>GenBank acc. no.</b> |
|---------------------------------------------|-------------------------|
| ASV01                                       | PP406298                |
| ASV02                                       | PP406293                |
| ASV03                                       | PP406303                |
| ASV04                                       | PP406292                |
| ASV05                                       | PP406300                |
| ASV06                                       | PP406302                |
| ASV07                                       | PP406304                |
| ASV08                                       | PP406305                |
| ASV09                                       | PP406296                |
| ASV10                                       | PP406297                |
| ASV11                                       | PP406299                |
| ASV12                                       | PP406294                |
| ASV14                                       | PP406295                |
| ASV15                                       | PP406306                |
| ASV16                                       | PP406290                |
| ASV17                                       | PP406291                |
| ASV18                                       | PP407998                |
| ASV19                                       | PP407999                |
| <i>B. afzelii</i>                           | CP075440                |
| <i>B. afzelii</i>                           | NZ_CP009212             |
| <i>B. anserina</i>                          | CP013704                |
| <i>B. bavariensis</i>                       | NC_6156                 |
| <i>B. bissetiae</i>                         | CP002746                |
| <i>B. carolinensis</i>                      | NZ_CP132445             |
| <i>B. carolinensis</i>                      | NZ_CP132465             |
| <i>B. chilensis</i>                         | CP009910                |
| <i>B. coriacea</i>                          | NZ_CP005745             |
| <i>B. crocidurae</i>                        | NZ_CP004267             |
| <i>B. duttonii</i>                          | NZ_AZIT01000001         |
| <i>B. garinii</i>                           | CP075451                |
| <i>B. garinii</i>                           | NZ_CP028861             |
| <i>B. garinii</i> subsp. <i>bavariensis</i> | NR_178227               |
| <i>B. hermsii</i>                           | NZ_CP011060             |
| <i>B. lusitaniae</i>                        | NZ_CP124050             |
| <i>B. maritima</i>                          | NZ_CP044535             |
| <i>B. miyamotoi</i>                         | MZ918969                |
| <i>B. miyamotoi</i>                         | MZ918974                |
| <i>B. miyamotoi</i>                         | MZ918983                |
| <i>B. miyamotoi</i>                         | MZ918981                |
| <i>B. parkeri</i>                           | NZ_CP007022             |
| <i>B. recurrentis</i>                       | NC_11244                |
| <i>B. spielmanii</i>                        | NZ_CP124042             |

|                       |                 |
|-----------------------|-----------------|
| <i>B. turcica</i>     | NZ_CP028884     |
| <i>B. turicatae</i>   | NC_8710         |
| <i>B. valaisiana</i>  | NZ_ABCY02000001 |
| <i>B. valaisiana</i>  | U78154          |
| <i>B. valaisiana</i>  | U78155          |
| <i>B. yangtzensis</i> | CP124002        |
| <i>Borrelia</i> sp.   | AY570512        |
